# Supplementary material
Source: PubMed Central journal article supplement (PMC8379974)
Supplement: pnas.2104162118.sapp.pdf [file pnas.2104162118.sapp.pdf]

## Supporting Information for

### Drivers and suppressors of triple-negative breast cancer

Wanfu Wu<sup>a</sup>, Margaret Warner<sup>a</sup>, Li Wang<sup>a</sup>, Wei-Wei He<sup>b</sup>, Ruipeng Zhao<sup>c</sup>, Cindy Botero<sup>a</sup>, Bo Huang<sup>a</sup>, Charlotte Ion<sup>d</sup>, Charles Coombes<sup>d</sup>, Jan-Ake Gustafsson<sup>a,e,1</sup>

<sup>1</sup> To whom correspondence may be addressed:

Jan-Ake Gustafsson: [jgustafsson@uh.edu](mailto:jgustafsson@uh.edu)

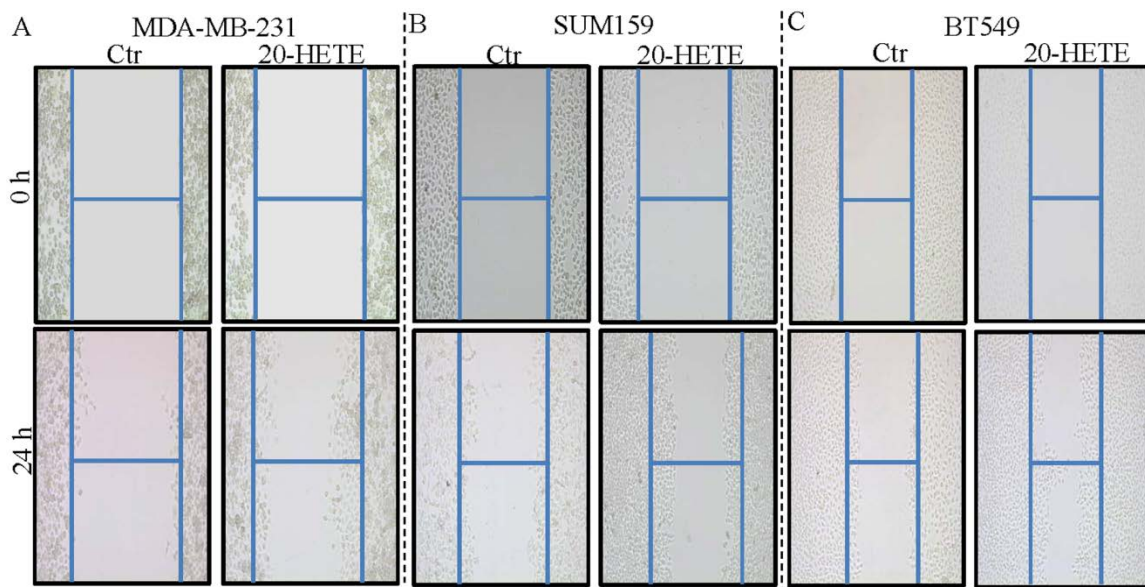

**Fig. S1.** The effect of 20-HETE on the migration of TNBC cells. 20-HETE treatment increased the cell migration of MDA-MB-231(A), SUM159 (B) and BT549 (C).

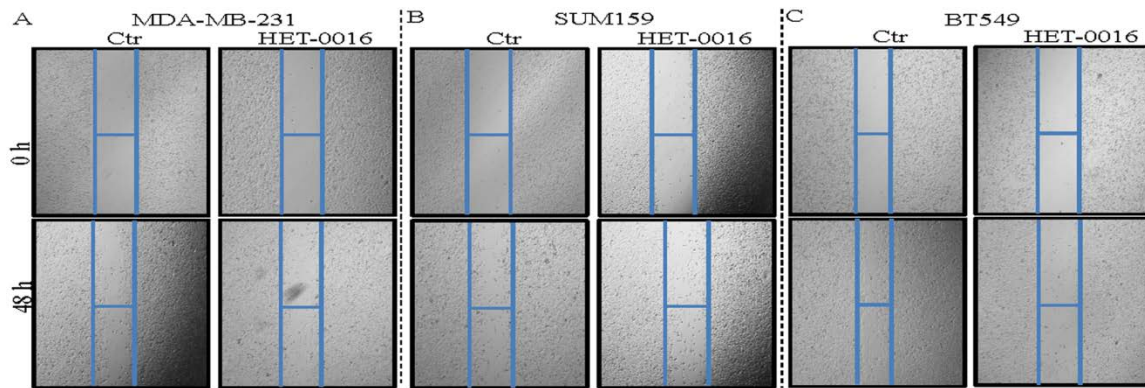

**Fig. S2.** The effect of HET-0016 on the migration of TNBC cells. HET-0016 treatment decreased the cell migration of MDA-MB-231(A), SUM159 (B) and BT549 (C).

**Table S1.** The number of significant genes

|      | <b>M vs nadj</b> |
|------|------------------|
| Down | 714              |
| NS   | 14208            |
| Up   | 565              |

M: malignant parts; nadj: normal adjacent parts; NS: not significant.
